# Supplementary material for: Development of a test that measures real-time HER2 signaling function in live breast cancer cell lines and primary cells
Source: Springer Nature journal article supplement (doi:10.1186/s12885-017-3181-0), 2017-03-16

**A**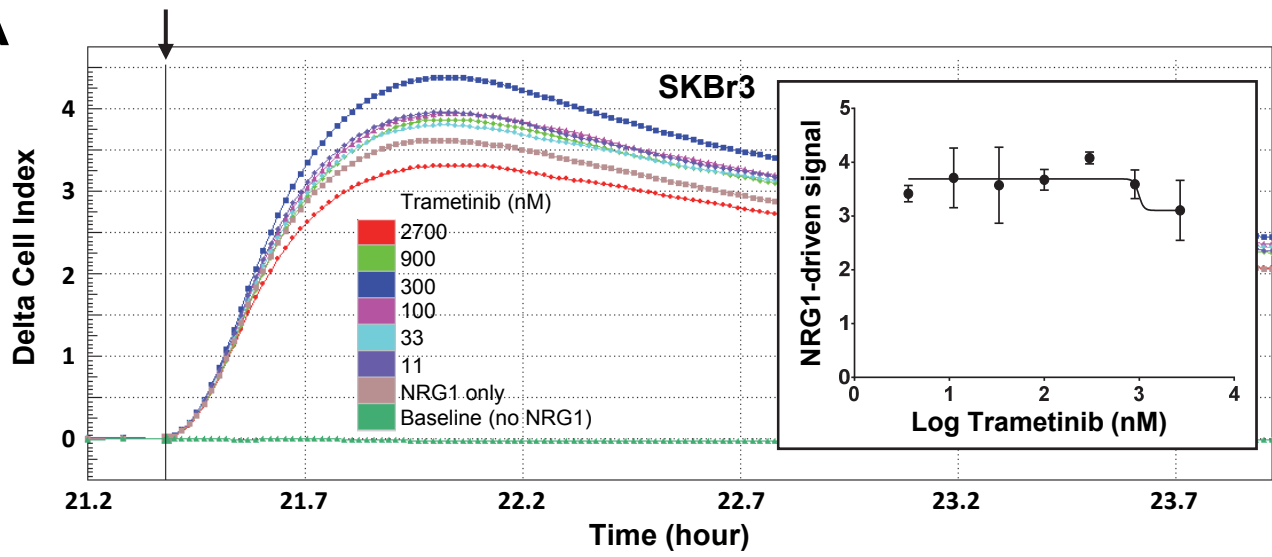**B**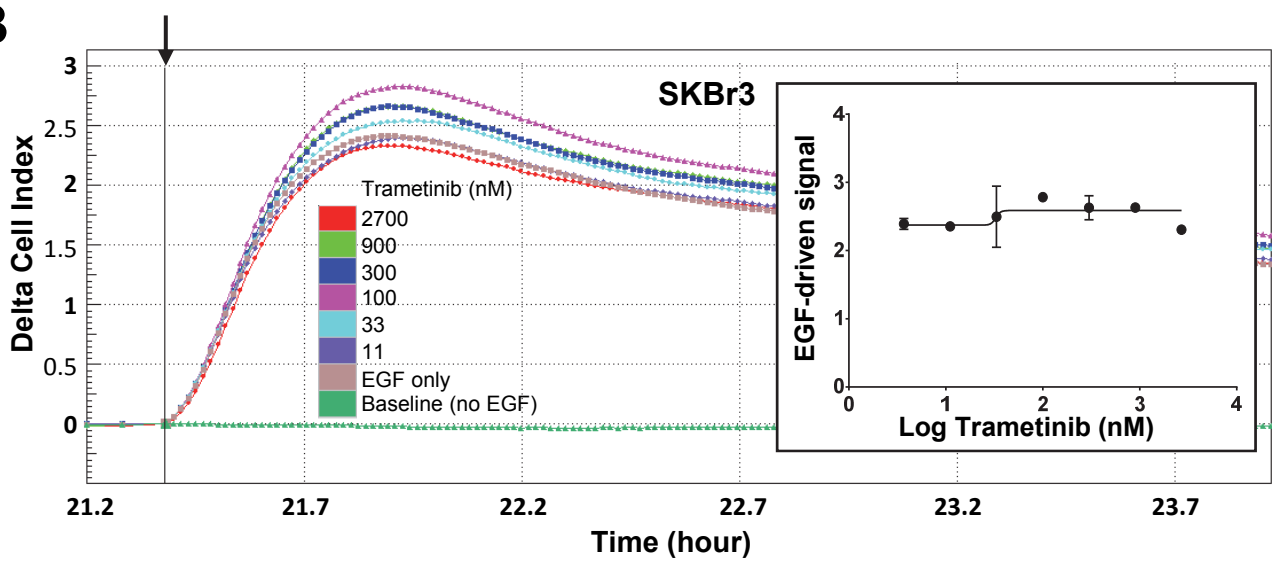

Supplement: MOESM3 [file 12150050]
